# Supplementary material for: An insight into the firing conditions of Chinese blue-and-white porcelain through XANES
Source: Royal Society of Chemistry journal article supplement (doi:10.1039/d2ja00006g), 2022-01-01
Supplement: d2ja00006g1.pdf [file d2ja00006g1.pdf]

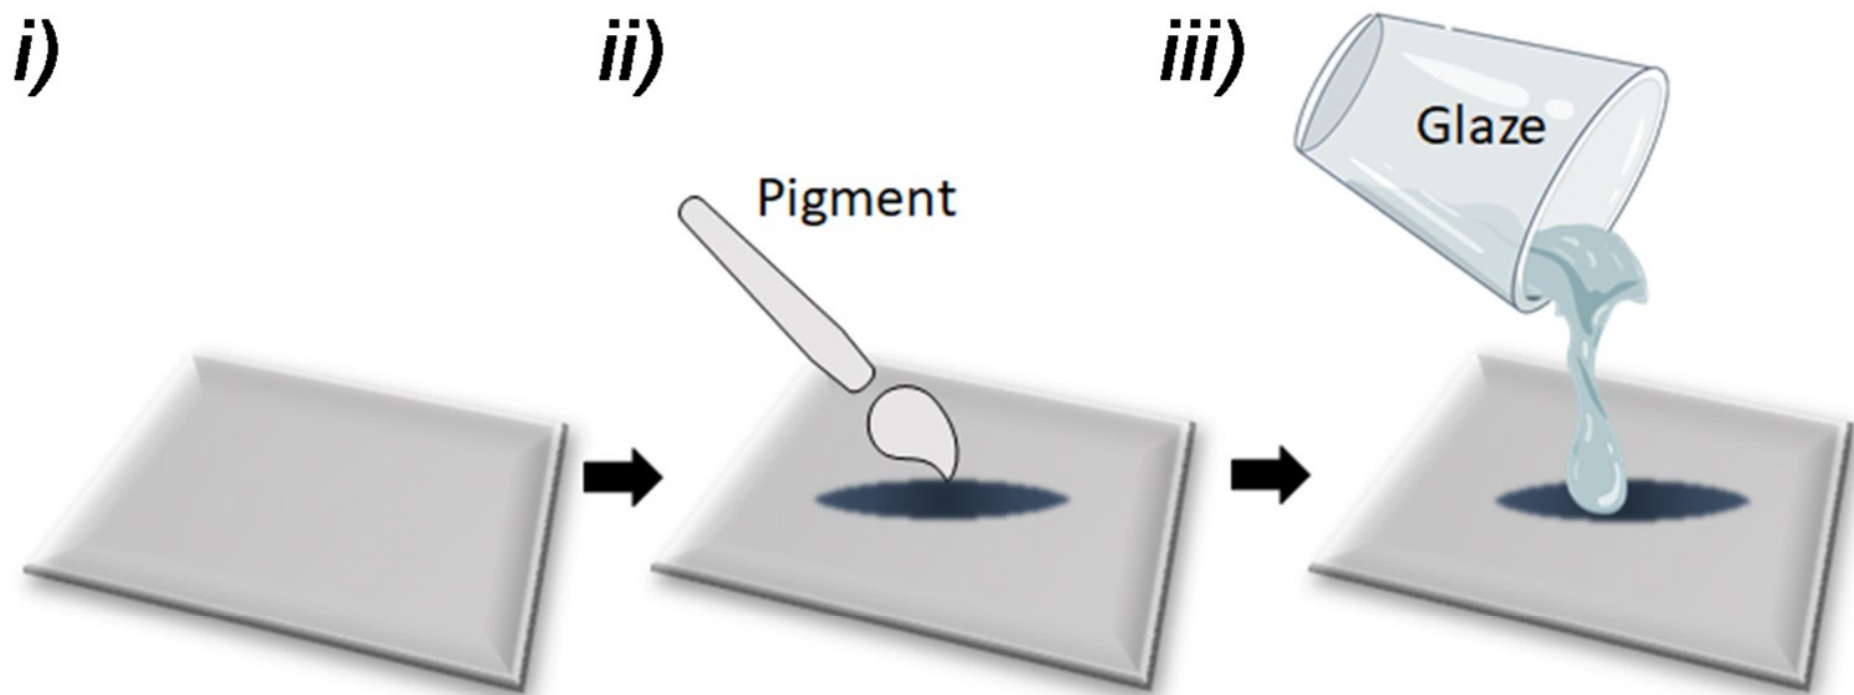

***Fig. S1 - Production process of the underglaze models:  
i) ceramic body, ii) application of the pigment and iii) glazing.***

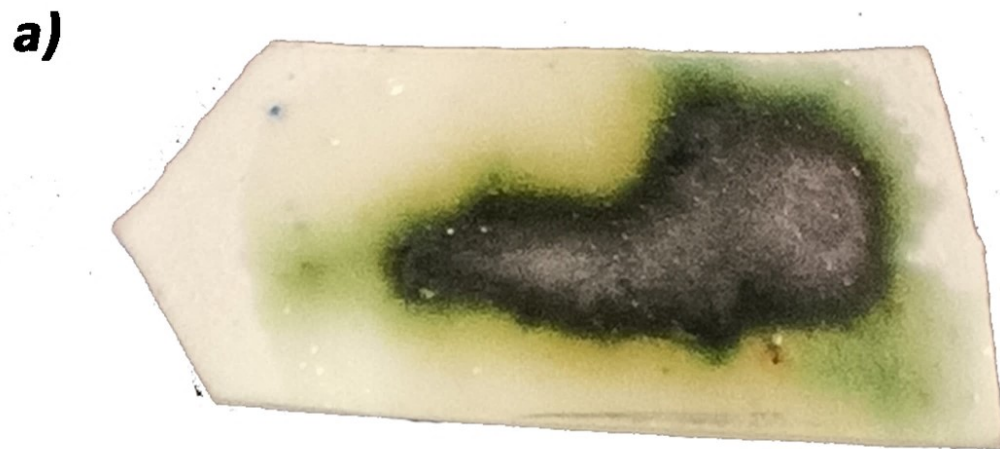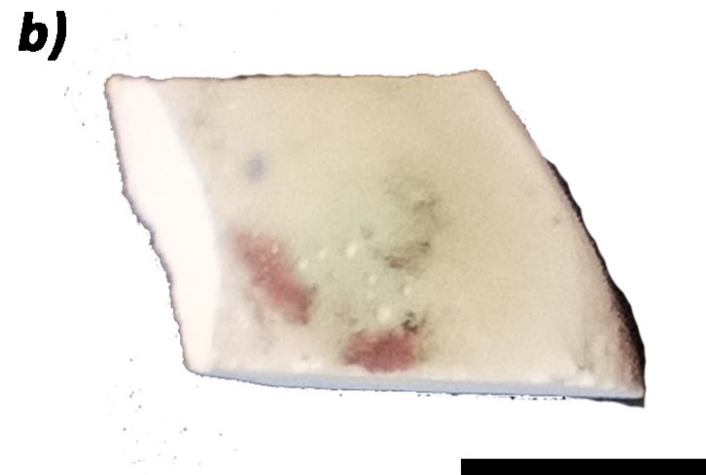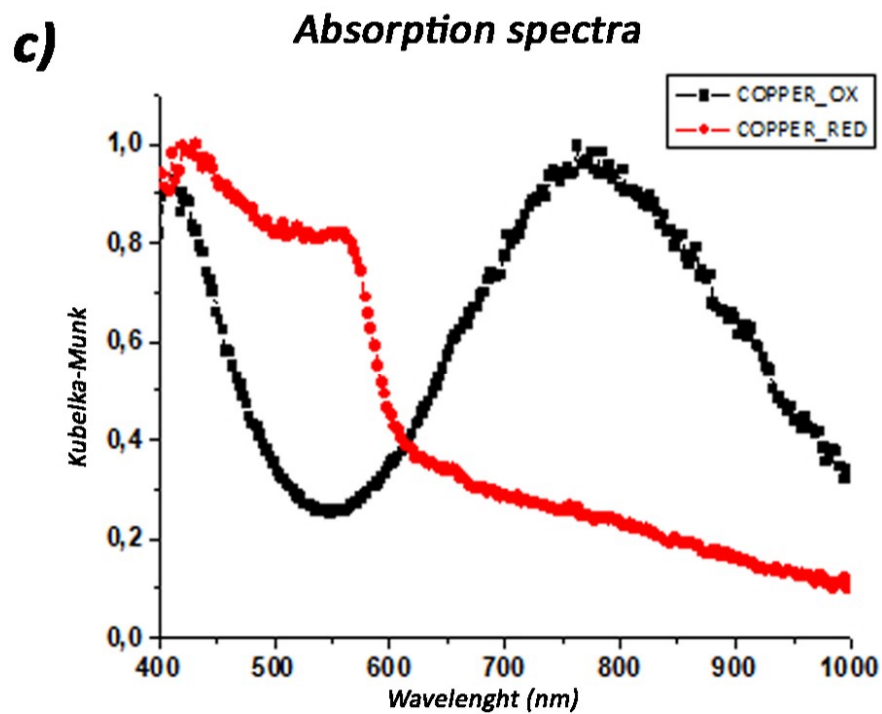

**Fig. S1 – Copper samples used for control of the firing atmosphere. a) Green coloured COPPER\_OX fired in air atmosphere; b) red coloured COPPER\_RED fired in reductive atmosphere; and c) Absorption spectra of COPPER\_OX and COPPER\_RED presenting the band of  $\text{Cu}^{2+}$  at 740–880 nm (black squares) and Cu nanoparticles for COPPER\_RED at 575 nm (red circles).**

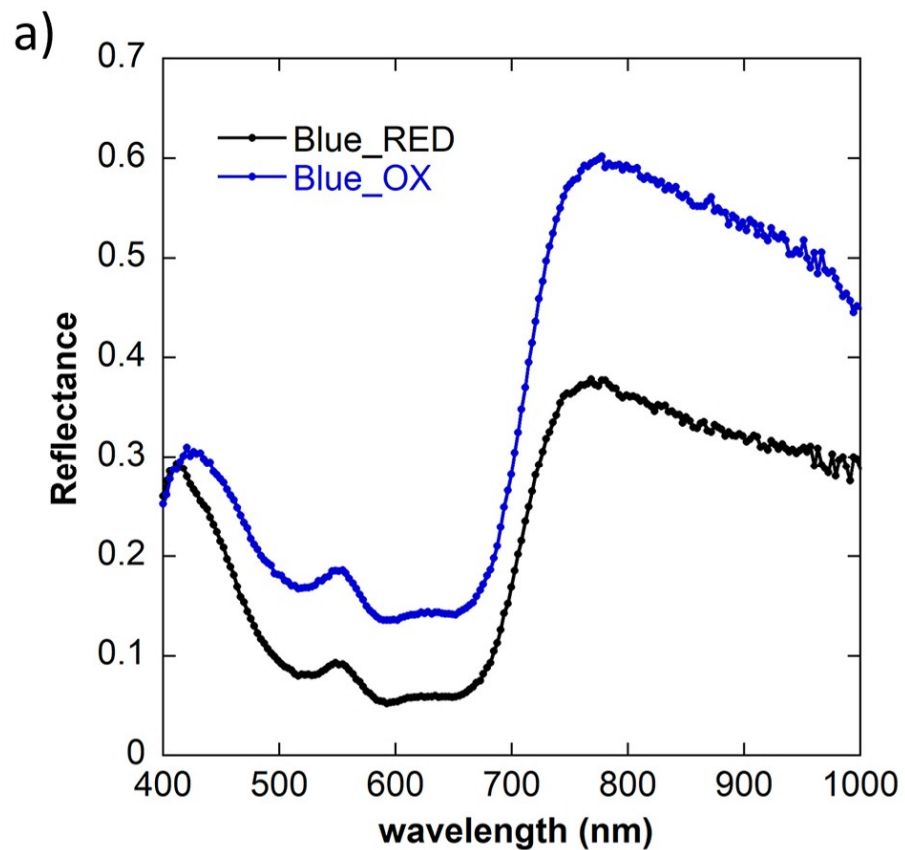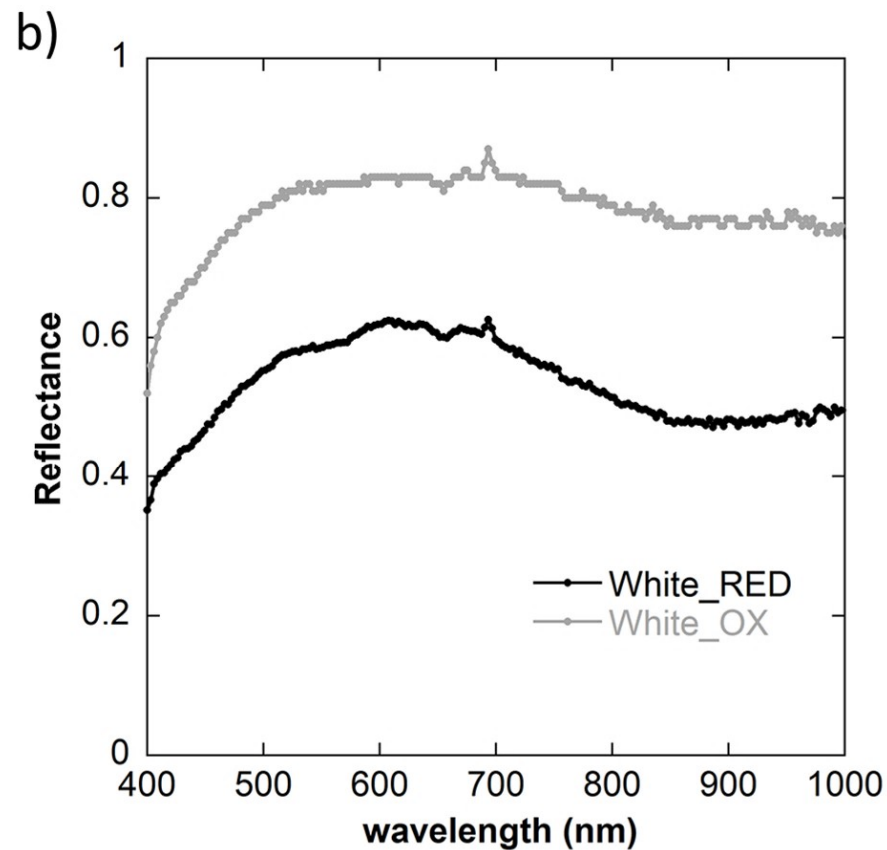

Figure 3S. Vis-SWIR reflectance spectra of the produced samples produced in air and reductive atmosphere: a) blue models and b) white models (without colourant).

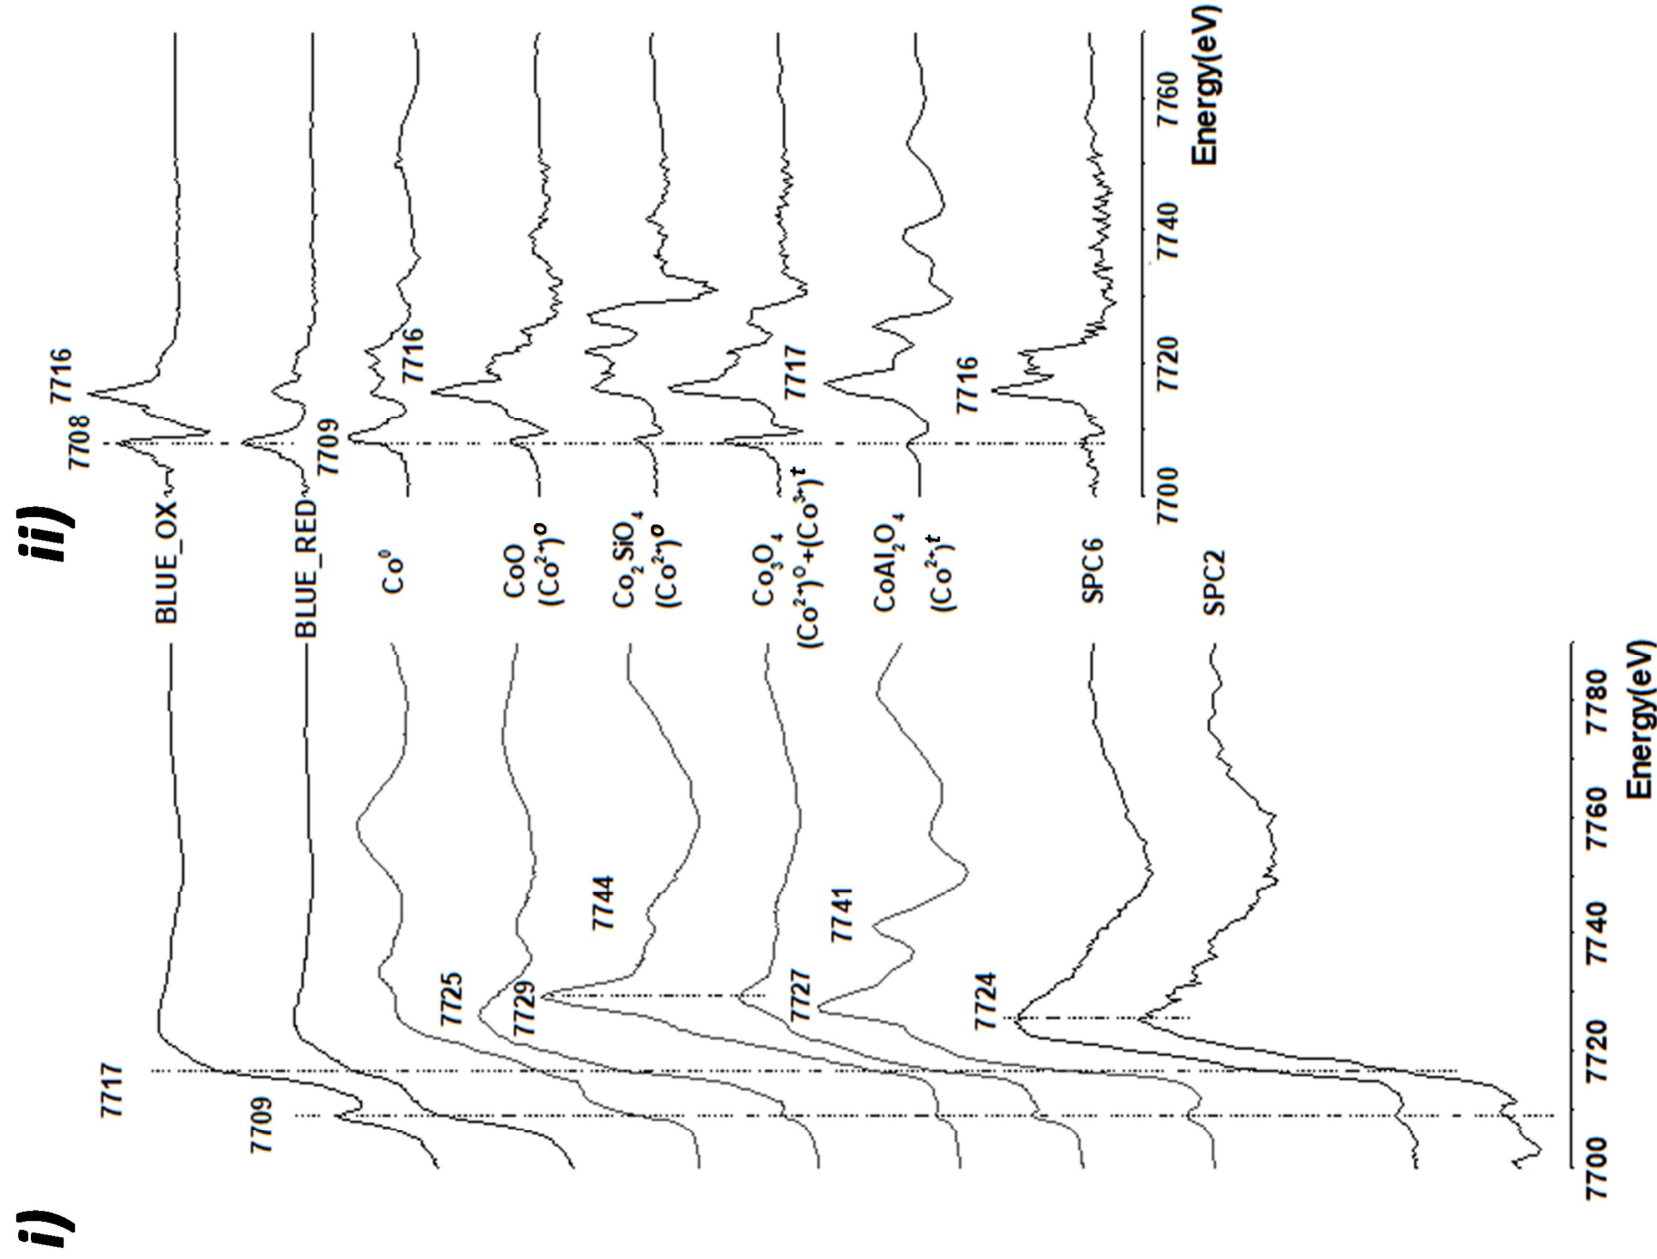

Fig. S4 - Figure 6. Normalized Co K-edge XANES spectra (i) collected from the blue underglaze models BLUE\_OX and BLUE\_RED, Chinese Blue-and-white porcelain (SPC2 and SPC6) and comparison with Co metal foil and Co reference compounds and (ii) corresponding first derivative.

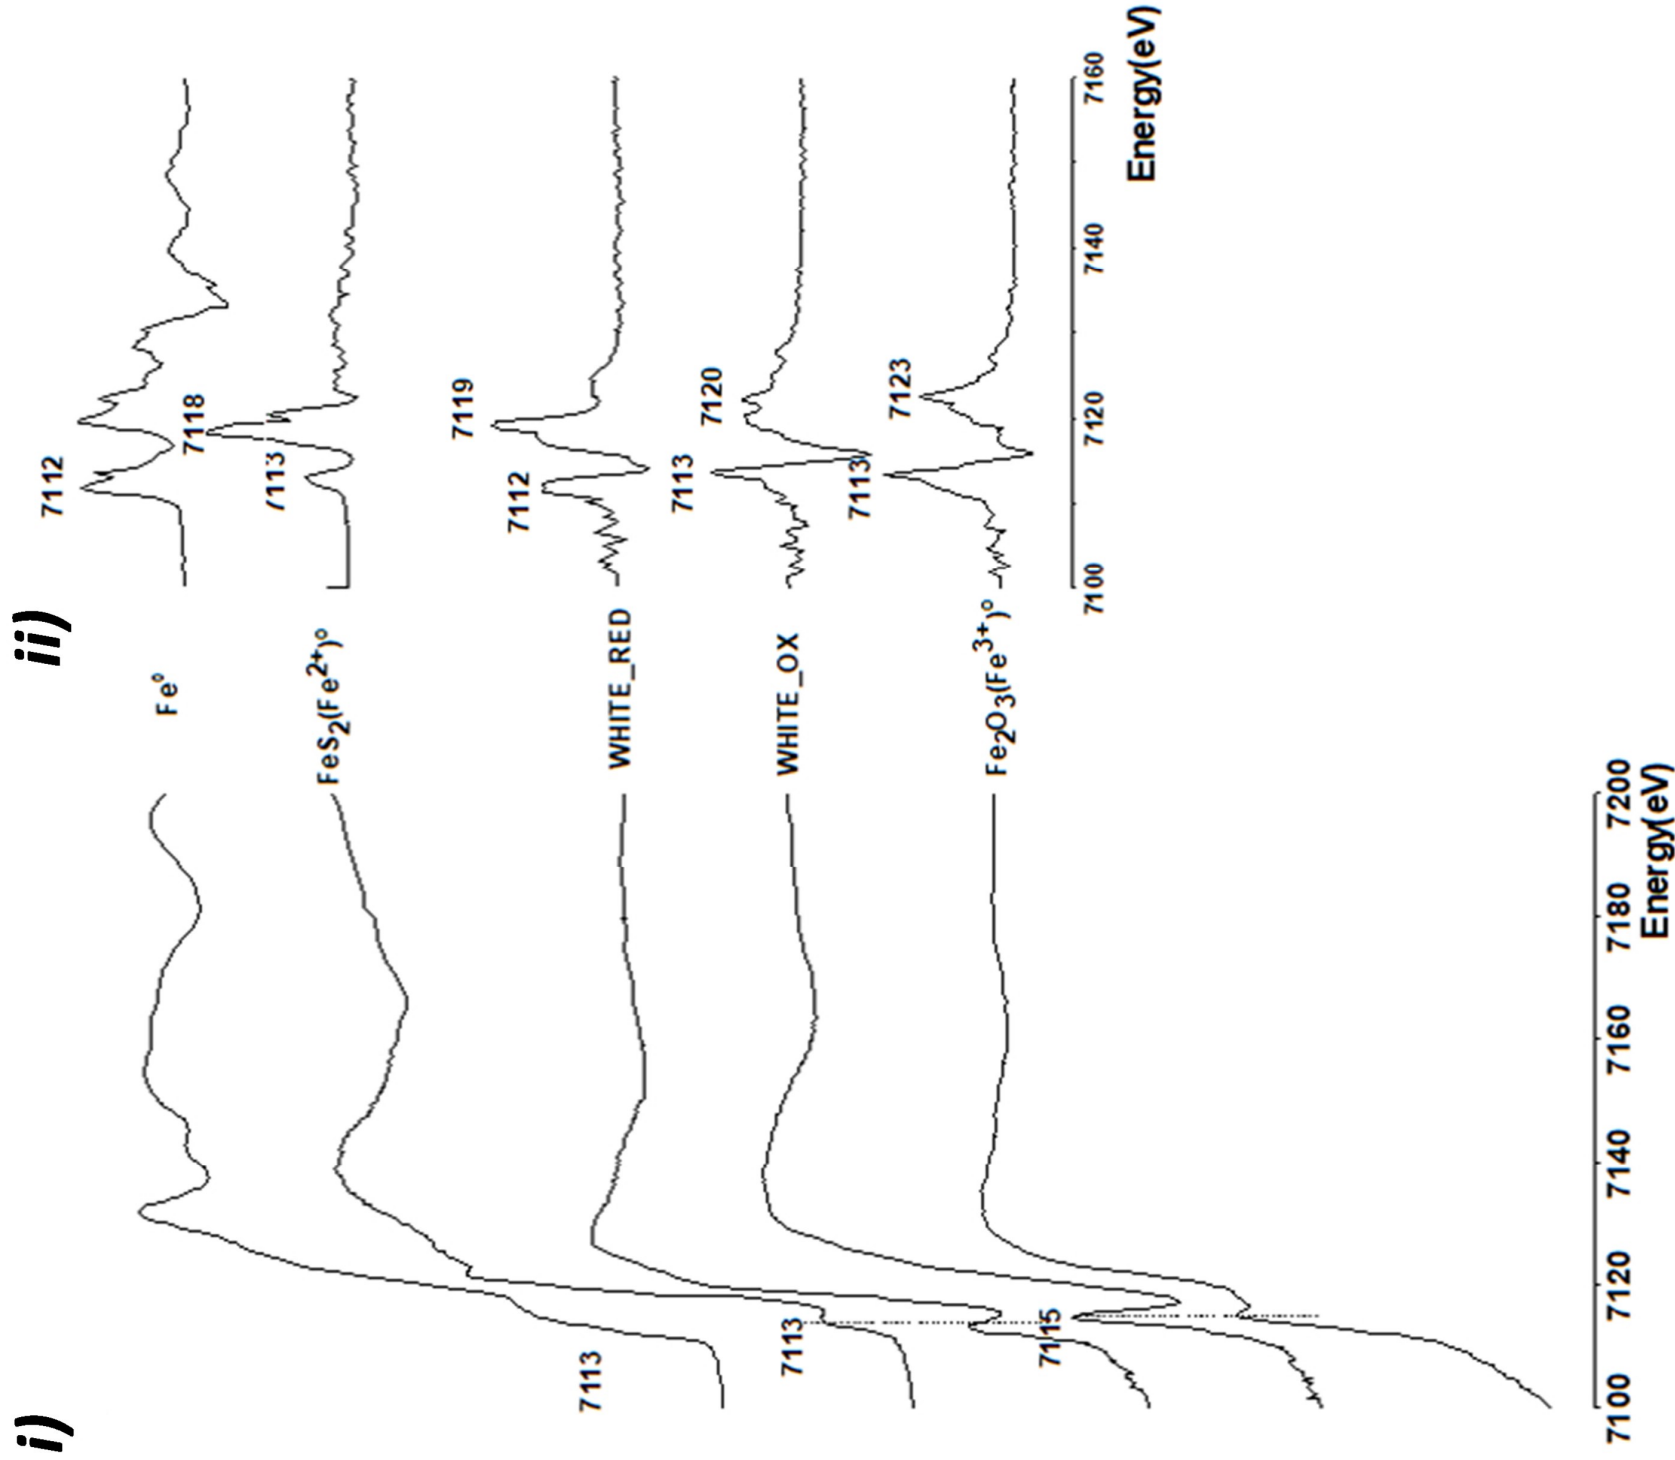

**Fig. S5 - Normalized Fe K-edge XANES spectra (i) collected from the selected Co model compounds and the WHITE\_RED and WHITE\_OX models and corresponding (ii) first derivative.**
